# Supplementary material
Source: Royal Society of Chemistry journal article supplement (doi:10.1039/d6ay00447d)
Supplement: d6ay00447d1.pdf [file d6ay00447d1.pdf]

**Application of spraying based liquid microextraction coupled with gas chromatography-mass spectrometry for the determination of dipropetryn at trace levels in corn flour samples**

Sezin Erarpat Bodur<sup>a\*</sup>

*<sup>a</sup>Department of Chemistry, Faculty of Art and Science, Yıldız Technical University, Esenler, İstanbul, 34220, Türkiye*

**\*Corresponding authors:** Sezin Erarpat Bodur, email: [sezinerarpat@gmail.com](mailto:sezinerarpat@gmail.com), Phone: +902123834174

**Supplementary Materials**

**Table S1.** %RSD values for low, middle and high concentration levels of standard solutions.

| Concentration, $\mu\text{g kg}^{-1}$ | %RSD** |
|--------------------------------------|--------|
| 1.10                                 | 6.1    |
| 10.30                                | 5.0    |
| 102.5                                | 9.7    |

**\*%RSD:** *Percent relative standard deviation for  $n=3$ .*
